# Supplementary material for: Effects of Cytochrome P450 Inhibition and Induction on the Phenotyping Metrics of the Basel Cocktail: A Randomized Crossover Study
Source: PubMed Central journal article supplement — Clin Pharmacokinet. 2015 Jun 28;55:79–91. doi: 10.1007/s40262-015-0294-y (PMC4712254; doi:10.1007/s40262-015-0294-y), 2015-06-28
Supplement: 40262_2015_294_MOESM1_ESM.pdf [file 40262_2015_294_MOESM1_ESM.pdf]

**Effects of cytochrome P450 inhibition and induction on the  
phenotyping metrics of the Basel cocktail: a randomized cross-over  
study**

**SUPPLEMENTARY MATERIAL**

Adrian Derungs<sup>\*</sup>, Massimiliano Donzelli<sup>\*</sup>, Benjamin Berger, Christoph Noppen,  
Stephan Krähenbühl, Manuel Haschke

Division of Clinical Pharmacology and Toxicology, Inselspital Bern, Bern, Switzerland  
(AD), Division of Clinical Pharmacology & Toxicology, Departments of Biomedicine  
and Clinical Research, University Hospital Basel, Switzerland (MD, BB, SK, MH), and  
Viollier AG (CN), Allschwil, Switzerland

<sup>\*</sup> contributed equally to this work

*Corresponding author:*

Manuel Haschke, MD

Division of Clinical Pharmacology & Toxicology

University Hospital Basel

Hebelstrasse 2

CH-4031 Basel, Switzerland

*phone:* + 41 61 328 68 66

*fax:* + 41 61 265 45 60

e-mail: [manuel.haschke@unibas.ch](mailto:manuel.haschke@unibas.ch)

## Supplementary Figure 1

### A Heart rate

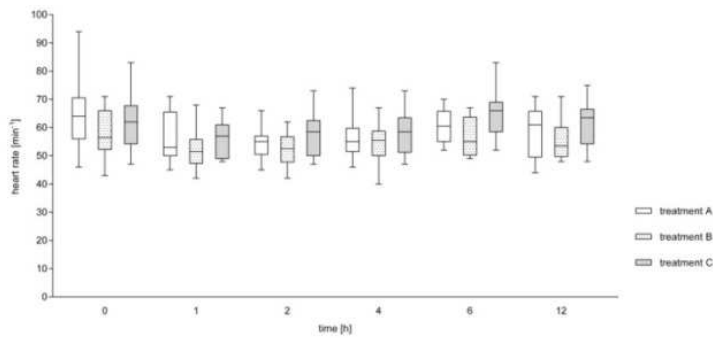

### B Systolic blood pressure

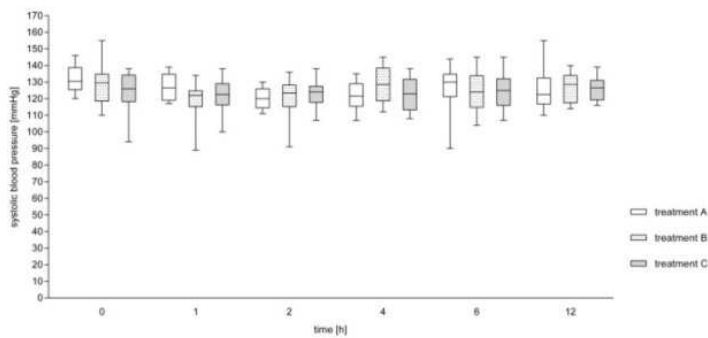

### C Diastolic blood pressure

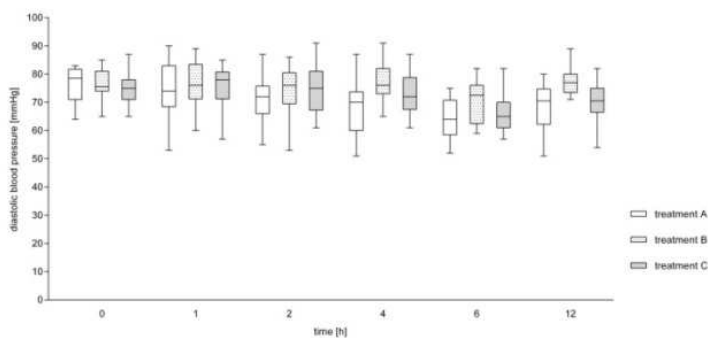

### D Sedation score

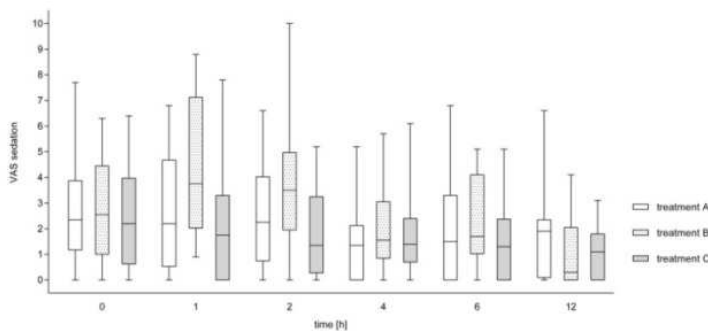

Heart rate (A), systolic (B) and diastolic (C) blood pressure and sedation scores (D) after administration of the Basel cocktail (baseline/treatment A, white boxes), after pretreatment with the CYP inhibitors ciprofloxacin, paroxetine and ketoconazole (inhibition/treatment B, dotted boxes) and after pretreatment with rifampicin (induction/treatment C, grey boxes). Whiskers represent the range with minimum and maximum, boxes represent the 25.-75. percentiles and the median.

## Supplementary Figure 2

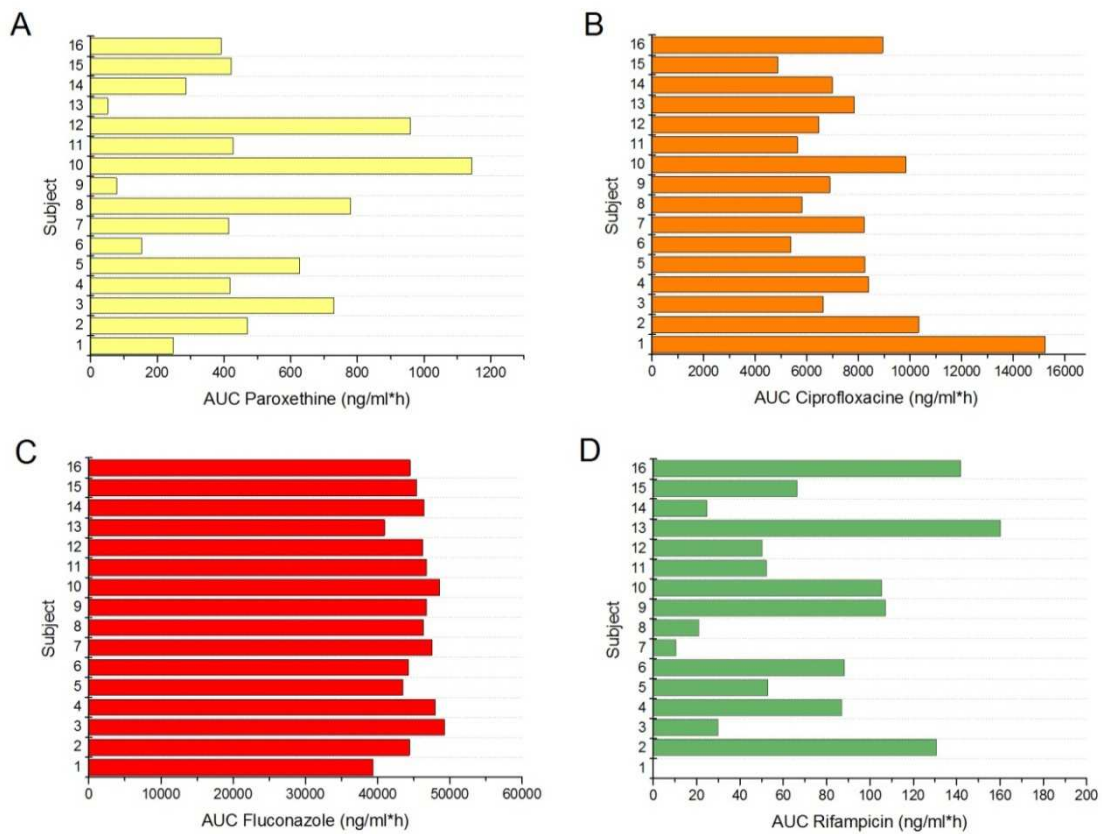

Exposure ( $AUC_{0-24h}$ ) to paroxetine (A), ciprofloxacin (B), fluconazole (C), and rifampicin (D). The last CYP inhibitor dose was taken 1 hour and the last rifampicin dose was taken 24 hours before application of the Basel cocktail. Subject 1 had approx. 100-fold higher rifampicin exposure compared to the other subjects, indicating insufficient auto-induction and was excluded from further analysis of induction data.

**Supplementary Table 1: Accuracy and Precision**

| nominal concentrations |                  | QC1 = 5 ng/mL | QC2 = 50 ng/mL | QC3 = 500 ng/mL |
|------------------------|------------------|---------------|----------------|-----------------|
| Metoprolol             | Overall Mean (n) | 5.51 (9)      | 50.9 (9)       | 454 (9)         |
|                        | Accuracy (Bias%) | 10.2          | 1.74           | -9.11           |
|                        | Precision (CV %) | 3.55          | 3.19           | 3.70            |
| OH-metoprolol          | Overall Mean (n) | 5.36(8)       | 49.9 (9)       | 488 (9)         |
|                        | Accuracy (Bias%) | 7.10          | -0.76          | -2.36           |
|                        | Precision (CV %) | 8.49          | 8.67           | 5.42            |
| Omeprazole             | Overall Mean (n) | 5.06 (9)      | 50.6 (9)       | 457 (9)         |
|                        | Accuracy (Bias%) | 1.36          | 1.020          | -8.62           |
|                        | Precision (CV %) | 4.84          | 3.15           | 2.48            |
| 5-OH-omeprazole        | Overall Mean (n) | 5.05 (9)      | 50.3 (9)       | 442 (9)         |
|                        | Accuracy (Bias%) | 0.860         | 0.670          | -11.6           |
|                        | Precision (CV %) | 5.20          | 5.33           | 3.28            |
| Losartan               | Overall Mean (n) | 5.24 (9)      | 51.4 (9)       | not measured    |
|                        | Accuracy (Bias%) | 4.80          | 6.68           |                 |
|                        | Precision (CV %) | 8.10          | 6.68           |                 |
| E-3174                 | Overall Mean (n) | 5.28 (9)      | 52.4 (9)       | 460 (9)         |
|                        | Accuracy (Bias%) | 5.57          | 4.76           | -8.04           |
|                        | Precision (CV %) | 8.24          | 5.70           | 4.58            |
| Midazolam              | Overall Mean (n) | 5.41 (6)      | 49.9 (9)       | not measured    |
|                        | Accuracy (Bias%) | 8.12          | -0.18          |                 |
|                        | Precision (CV %) | 6.20          | 6.98           |                 |
| 1'-OH-midazolam        | Overall Mean (n) | 5.11 (8)      | 49.3 (8)       | 486 (9)         |
|                        | Accuracy (Bias%) | 2.16          | -1.49          | -2.90           |
|                        | Precision (CV %) | 9.11          | 4.29           | 2.64            |
| Caffeine               | Overall Mean (n) | not measured  | 50.8           | 506             |
|                        | Accuracy (Bias%) |               | 1.64           | 1.28            |
|                        | Precision (CV %) |               | 10.40          | 6.22            |
| Paraxanthine           | Overall Mean (n) | not measured  | 50.7 (9)       | 505 (9)         |
|                        | Accuracy (Bias%) |               | 1.37           | 1.01            |
|                        | Precision (CV %) |               | 8.27           | 5.06            |
| Efavirenz              | Overall Mean (n) | 5.05 (9)      | 48.6 (9)       | 480 (9)         |
|                        | Accuracy (Bias%) | 0.88          | -2.86          | -3.99           |
|                        | Precision (CV %) | 5.59          | 2.66           | 1.89            |
| 8-OH-efavirenz         | Overall Mean (n) | 5.31 (9)      | 50.0 (9)       | 445 (9)         |
|                        | Accuracy (Bias%) | 6.10          | 0              | -10.9           |
|                        | Precision (CV %) | 4.58          | 5.00           | 2.35            |

**Supplementary Table 2: Calibration Ranges**

| <b>Analyte</b>         | <b>LLOQ plasma<br/>(ng/mL)</b> | <b>ULOQ plasma<br/>(ng/ml)</b> |
|------------------------|--------------------------------|--------------------------------|
| <b>Metoprolol</b>      | 1                              | 1000                           |
| <b>OH-metoprolol</b>   | 0.5                            | 1000                           |
| <b>Omeprazole</b>      | 0.5                            | 1000                           |
| <b>5-OH-omeprazole</b> | 0.5                            | 1000                           |
| <b>Losartan</b>        | 1.0                            | 1000                           |
| <b>E3174</b>           | 1.0                            | 1000                           |
| <b>Midazolam</b>       | 0.5                            | 1000                           |
| <b>1'-OH-midazolam</b> | 0.5                            | 1000                           |
| <b>Caffeine</b>        | 10.0                           | 1000                           |
| <b>Paraxanthine</b>    | 10.0                           | 1000                           |
| <b>Efavirenz</b>       | 0.5                            | 1000                           |
| <b>8-OH-efavirenz</b>  | 1.0                            | 1000                           |

**Supplementary Table 3: Autosampler Stability (24 hours at 10°C)**

| nominal concentrations |                             | QC1 = 5<br>ng/mL | QC2 = 50<br>ng/mL | QC3 = 500<br>ng/mL |
|------------------------|-----------------------------|------------------|-------------------|--------------------|
| <b>Metoprolol</b>      | Overall Mean t=0<br>(n=3)   | 5.55             | 49.9              | 484                |
|                        | Overall Mean t=24h<br>(n=3) | 5.70             | 47.1              | 469                |
|                        | <b>Stability</b>            | <b>103</b>       | <b>94</b>         | <b>97</b>          |
| <b>OH-metoprolol</b>   | Overall Mean t=0<br>(n=3)   | 4.74             | 50.4              | 479                |
|                        | Overall Mean t=24h<br>(n=3) | 4.84             | 45.7              | 444                |
|                        | <b>Stability</b>            | <b>102</b>       | <b>91</b>         | <b>93</b>          |
| <b>Omeprazole</b>      | Overall Mean t=0<br>(n=3)   | 5.05             | 51.9              | 478                |
|                        | Overall Mean t=24h<br>(n=3) | 5.13             | 49.8              | 476                |
|                        | <b>Stability</b>            | <b>102</b>       | <b>96</b>         | <b>100</b>         |
| <b>5-OH-omeprazole</b> | Overall Mean t=0<br>(n=3)   | 4.87             | 50.8              | 496                |
|                        | Overall Mean t=24h<br>(n=3) | 5.32             | 49.3              | 492                |
|                        | <b>Stability</b>            | <b>109</b>       | <b>97</b>         | <b>99</b>          |
| <b>Losartan</b>        | Overall Mean t=0<br>(n=3)   | 5.04             | 51.1              | 484                |
|                        | Overall Mean t=24h<br>(n=3) | 5.10             | 50.0              | 495                |
|                        | <b>Stability</b>            | <b>101</b>       | <b>98</b>         | <b>102</b>         |
| <b>E-3174</b>          | Overall Mean t=0<br>(n=3)   | 4.76             | 49.1              | 479                |
|                        | Overall Mean t=24h<br>(n=3) | 5.11             | 52.2              | 515                |
|                        | <b>Stability</b>            | <b>107</b>       | <b>106</b>        | <b>108</b>         |
| <b>Midazolam</b>       | Overall Mean t=0<br>(n=3)   | 4.79             | 50.0              | 481                |
|                        | Overall Mean t=24h<br>(n=3) | 4.86             | 52.3              | 495                |
|                        | <b>Stability</b>            | <b>101</b>       | <b>105</b>        | <b>103</b>         |
| <b>1'-OH-midazolam</b> | Overall Mean t=0<br>(n=3)   | 4.64             | 47.7              | 484                |
|                        | Overall Mean t=24h<br>(n=3) | 4.83             | 49.9              | 497                |
|                        | <b>Stability</b>            | <b>104</b>       | <b>105</b>        | <b>103</b>         |
| <b>Caffeine</b>        | Overall Mean t=0<br>(n=3)   |                  | 50.4              | 495                |
|                        | Overall Mean t=24h<br>(n=3) |                  | 55.0              | 493                |

|                       |                             |               |              |            |
|-----------------------|-----------------------------|---------------|--------------|------------|
|                       | <b>Stability</b>            |               | <b>109</b>   | <b>100</b> |
| <b>Paraxanthine</b>   | Overall Mean t=0<br>(n=3)   | 4.59          | 49.6         | 483        |
|                       | Overall Mean t=24h<br>(n=3) | 5.27          | 52.1         | 498        |
|                       | <b>Stability</b>            | <b>114.80</b> | <b>104.9</b> | <b>103</b> |
| <b>Efavirenz</b>      | Overall Mean t=0<br>(n=3)   |               | 50.4         | 486        |
|                       | Overall Mean t=24h<br>(n=3) |               | 50.1         | 515        |
|                       | <b>Stability</b>            |               | <b>100</b>   | <b>106</b> |
| <b>8-OH-efavirenz</b> | Overall Mean t=0<br>(n=3)   | 5.04          | 50.8         | 487        |
|                       | Overall Mean t=24h<br>(n=3) | 4.72          | 49.3         | 508        |
|                       | <b>Stability</b>            | <b>94</b>     | <b>97</b>    | <b>104</b> |

**Supplementary Table 4: PK parameters of probe drugs and metabolites**

|                                   |            | <b>AUC<sup>1</sup></b><br><b>(ng/ml*h)</b> | <b>point estimate and</b><br><b>90%CI for AUC ratio</b><br><b>from BE test</b> | <b>C<sub>max</sub></b><br><b>(ng/ml)</b> | <b>half-life</b><br><b>(h)</b> |
|-----------------------------------|------------|--------------------------------------------|--------------------------------------------------------------------------------|------------------------------------------|--------------------------------|
| <b>Caffeine</b>                   | baseline   | 7507 (6656-9469)                           | -                                                                              | 1088±264                                 | 5.0±2.0                        |
|                                   | inhibition | 12146 (10823-14836)                        | 162 (140 – 187)                                                                | 1129±277                                 | 7.8±2.8                        |
|                                   | induction  | 5761 (5145-7052)                           | 78 (67-91)                                                                     | 1046±203                                 | 3.7±1.6                        |
| <b>Paraxanthine</b>               | baseline   | 4695 (4093-5930)                           | -                                                                              | 338±110                                  | 9.2± 4.9                       |
|                                   | inhibition | 4620 (4002-6135)                           | 98 (86-113)                                                                    | 297±135                                  | 22.0±14.1                      |
|                                   | induction  | 3656 (3267-4392)                           | 80 (71-90)                                                                     | 340±76                                   | 7.1±4.5                        |
| <b>Efavirenz</b>                  | baseline   | 2780 (2611-3025)                           | -                                                                              | 247±73                                   | 61.7±16.5                      |
|                                   | inhibition | 2741 (2601-2935)                           | 99 (92-106)                                                                    | 222±51                                   | 61.6±17.2                      |
|                                   | induction  | 1709 (1593-1876)                           | 61 (57-65)                                                                     | 192±62                                   | 40.5±12.9                      |
| <b>OH-efavirenz</b>               | baseline   | 67 (61-78)                                 | -                                                                              | 21.2±38.8                                | 78.4±41.9                      |
|                                   | inhibition | 37 (34-44)                                 | 56 (51-61)                                                                     | 4.1±1.5                                  | 178.4±196.0                    |
|                                   | induction  | 81 (74-92)                                 | 116 (109-124)                                                                  | 15.8±6.6                                 | 51.4±69.4                      |
| <b>losartan</b>                   | baseline   | 33 (30-38)                                 | -                                                                              | 10.4±5.5                                 | 3.1±1.0                        |
|                                   | inhibition | 40 (35-49)                                 | 120 (106-135)                                                                  | 8.6±4.0                                  | 4.2±1.6                        |
|                                   | induction  | 14 (13-16)                                 | 61 (57-65)                                                                     | 7.5±12.3                                 | 4.4±6.0                        |
| <b>Losartan carb acid</b>         | baseline   | 390 (363-523)                              | -                                                                              | 39.0±16.8                                | 6.0±1.5                        |
|                                   | inhibition | 168 (154-254)                              | 43 (37-51)                                                                     | 12.2±6.0                                 | 11.7±5.6                       |
|                                   | induction  | 201 (185-262)                              | 52 (46-59)                                                                     | 30.6±17.0                                | 4.0±0.8                        |
| <b>omeprazole</b>                 | baseline   | 186 (156-269)                              | -                                                                              | 132.2±91.3                               | 0.81±0.43                      |
|                                   | inhibition | 2511 (2315-2809)                           | 1342 (1112-1620)                                                               | 453.1±49.8                               | 3.06±0.54                      |
|                                   | induction  | 13 (11-22)                                 | 6.8 (5.4-8.6)                                                                  | 18.9±39.1                                | 0.56±0.26                      |
| <b>OH-omeprazole</b>              | baseline   | 210 (196-230)                              | -                                                                              | 85.6±23.1                                | 1.14±0.25                      |
|                                   | inhibition | 140 (131-153)                              | 67 (59-76)                                                                     | 19.8±5.5                                 | 4.07±0.76                      |
|                                   | induction  | 60 (53-70)                                 | 28 (25-32)                                                                     | 32.0±10.3                                | 0.92±0.71                      |
| <b>metoprolol</b>                 | baseline   | 104 (98-112)                               | -                                                                              | 6.7±1.5                                  | 17.8±12.3                      |
|                                   | inhibition | 213 (201-230)                              | 207 (188 – 227)                                                                | 12.0±1.8                                 | 38.5±35.7                      |
|                                   | induction  | 88 (82-96)                                 | 86 (79 – 93)                                                                   | 5.9±1.4                                  | 14.2±6.8                       |
| <b>OH-metoprolol</b>              | baseline   | 61 (57-69)                                 | -                                                                              | 3.4±0.9                                  | 29.9±20.4                      |
|                                   | inhibition | 28 (23-36)                                 | 40 (33-49)                                                                     | 1.3±0.6                                  | 19.8±10.5                      |
|                                   | induction  | 61 (55-70)                                 | 98 (93-104)                                                                    | 3.5±1.0                                  | 26.0±16.2                      |
| <b>midazolam</b>                  | baseline   | 24 (22-30)                                 | -                                                                              | 11.4±4.0                                 | 2.1±0.7                        |
|                                   | inhibition | 98 (90-114)                                | 409 (350-478)                                                                  | 28.3±6.3                                 | 4.3±1.9                        |
|                                   | induction  | 3.8 (3.4-5.2)                              | 15 (11-20)                                                                     | 3.4±1.4                                  | 0.9±0.2                        |
| <b>1-OH-midazolam</b>             | baseline   | 16 (14-19)                                 | -                                                                              | 8.1±3.6                                  | 1.59±0.46                      |
|                                   | inhibition | 22 (20-27)                                 | 143 (121-168)                                                                  | 7.7±3.5                                  | 2.54±0.93                      |
|                                   | induction  | 1.0 (0.9-1.3)                              | 6.3 (4.7-8.3)                                                                  | 1.3±0.6                                  | n.d.                           |
| <b>1-OH-midazolam<sup>2</sup></b> | baseline   | 151 (141-167)                              | -                                                                              | 58.6±17.2                                | 2.0±0.7                        |
|                                   | inhibition | 160 (147-181)                              | 106 (102-111)                                                                  | 36.4±10.2                                | 2.8±0.5                        |
|                                   | induction  | 106 (97-120)                               | 71 (67-75)                                                                     | 51.7±15.5                                | 1.2±0.4                        |

AUC data are given as geometric mean (90% CI), C<sub>max</sub> and half-life data are given as mean±sd. n.d., not determined due to insufficient data above LLOQ

<sup>1</sup> AUC<sub>last</sub> for losartan, losartan carboxylic acid, omeprazole, 5-hydroxyomeprazole, midazolam, 1-hydroxymidazolam, AUC<sub>24</sub> for all other analytes

<sup>2</sup> total 1-hydroxymidazolam concentration after deglucuronidation with beta-glucuronidase



## Supplementary Table 5: Pharmacogenetic Analysis

| CYP  | Allele           | Subj 1 | Subj 2 | Subj 3 | Subj 4 | Subj 5 | Subj 6 | Subj 7 | Subj 9 | Subj 10 | Subj 11 | Subj 12 | Subj 13 | Subj 14 | Subj 15 | Subj 16 |
|------|------------------|--------|--------|--------|--------|--------|--------|--------|--------|---------|---------|---------|---------|---------|---------|---------|
| 1A2  | <i>CYP1A2*1F</i> | HT     | HT     | HO     | HT     | WT     | HT     | HT     | HO     | HO      | HT      | HT      | HT      | HT      | HT      | HO      |
| 2B6  | <i>CYP2B6*6</i>  | HT     | WT     | WT     | HT     | WT     | HT     | HT     | HT     | WT      | HT      | HT      | HT      | HT      | WT      | WT      |
| 2C9  | <i>CYP2C9*2</i>  | WT      | WT      | WT      | WT      | HT      | WT      | WT      |
|      | <i>CYP2C9*3</i>  | WT     | WT     | WT     | HT     | HT     | WT     | HT     | WT     | WT      | WT      | HT      | HT      | WT      | WT      | WT      |
| 2C19 | <i>CYP2C19*2</i> | WT     | WT     | WT     | WT     | WT     | HT     | WT     | HT     | HT      | WT      | WT      | HT      | WT      | HO      | WT      |
|      | <i>CYP2C19*3</i> | WT      | WT      | WT      | WT      | WT      | WT      | WT      |
| 2D6  | <i>CYP2D6*3</i>  | WT      | WT      | WT      | WT      | WT      | WT      | WT      |
|      | <i>CYP2D6*4</i>  | WT     | HT     | HT     | HT     | HT     | WT     | WT     | WT     | HT      | WT      | HT      | WT      | WT      | WT      | HT      |
|      | <i>CYP2D6*5</i>  | WT      | WT      | WT      | WT      | WT      | WT      | WT      |
|      | <i>CYP2D6*6</i>  | WT      | WT      | WT      | WT      | WT      | WT      | WT      |
|      | <i>CYP2D6*XN</i> | neg     | neg     | neg     | neg     | neg     | neg     | neg     |
|      | <i>CYP2D6*41</i> | nd     | HT      | nd      | nd      | nd      | nd      | nd      | nd      |

HO, homozygous; HT, heterozygous; nd, not done; neg, no gene multiplication observed; WT, wild type. Subject 8 did not provide consent for pharmacogenetic analysis. *CYP2D6\*41* was only tested in subject 10.
